# Supplementary material
Source: Research Square preprint supplement (doi:10.21203/rs.3.rs-8793102/v1)

Supplementary Figure **S3**. Full Western Blot (antf-Cx29)

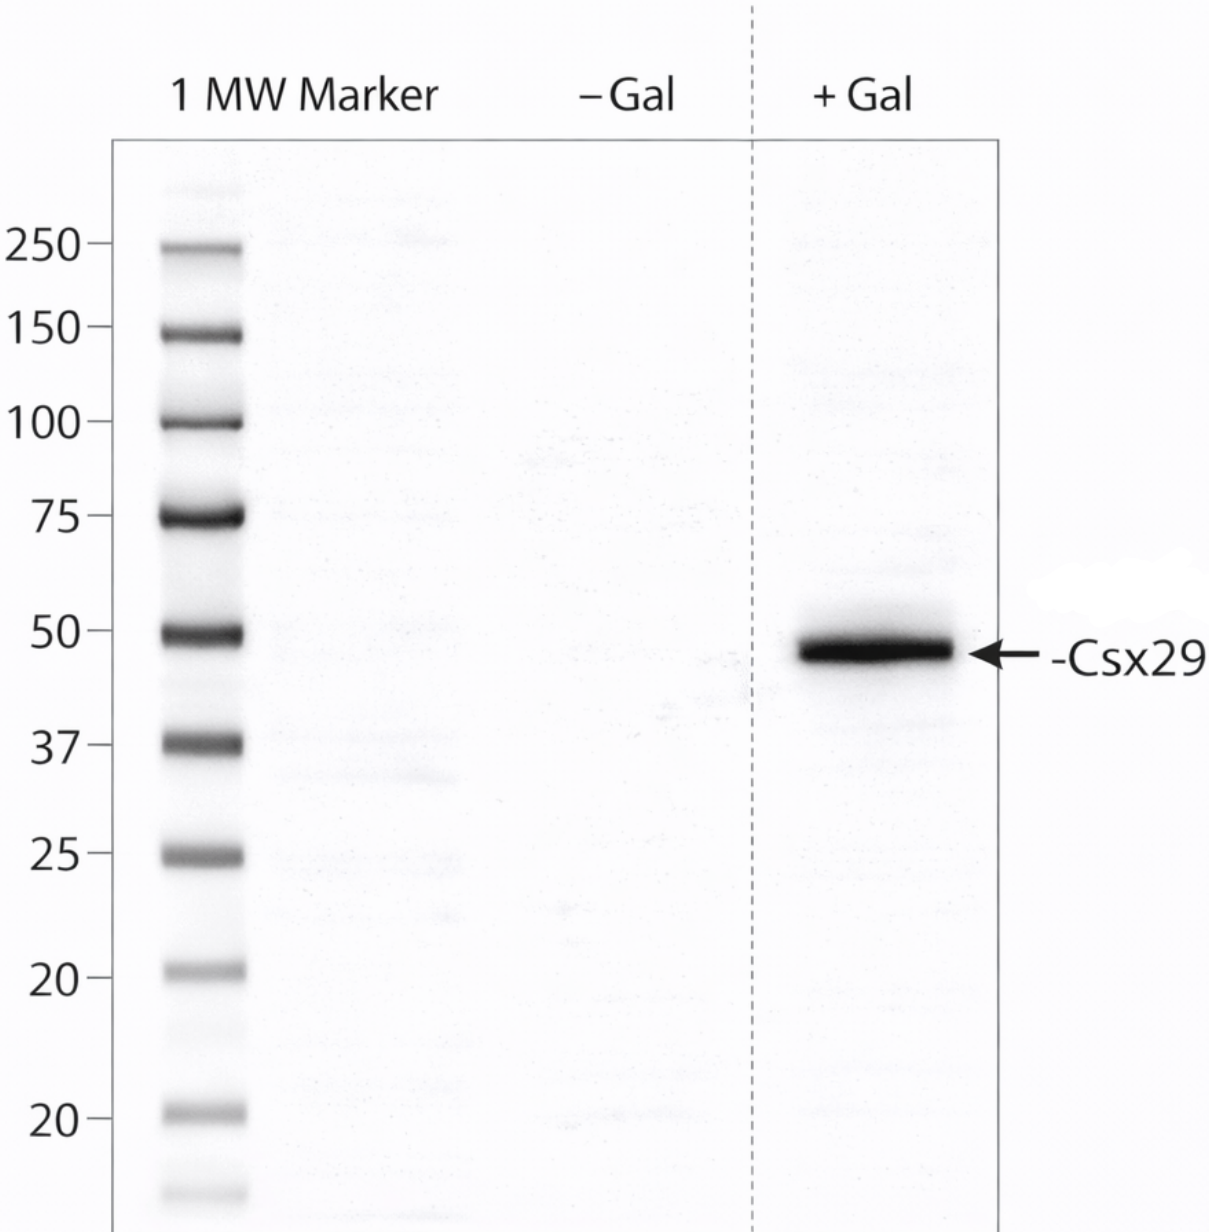

Supplement: Supplementary file 1 [file de9c7fc980b7cd37f98587b7.pdf]

Supplementary Figure **S2**. Full Western Blot (anti-FLAG for *dCas7-11*)

---

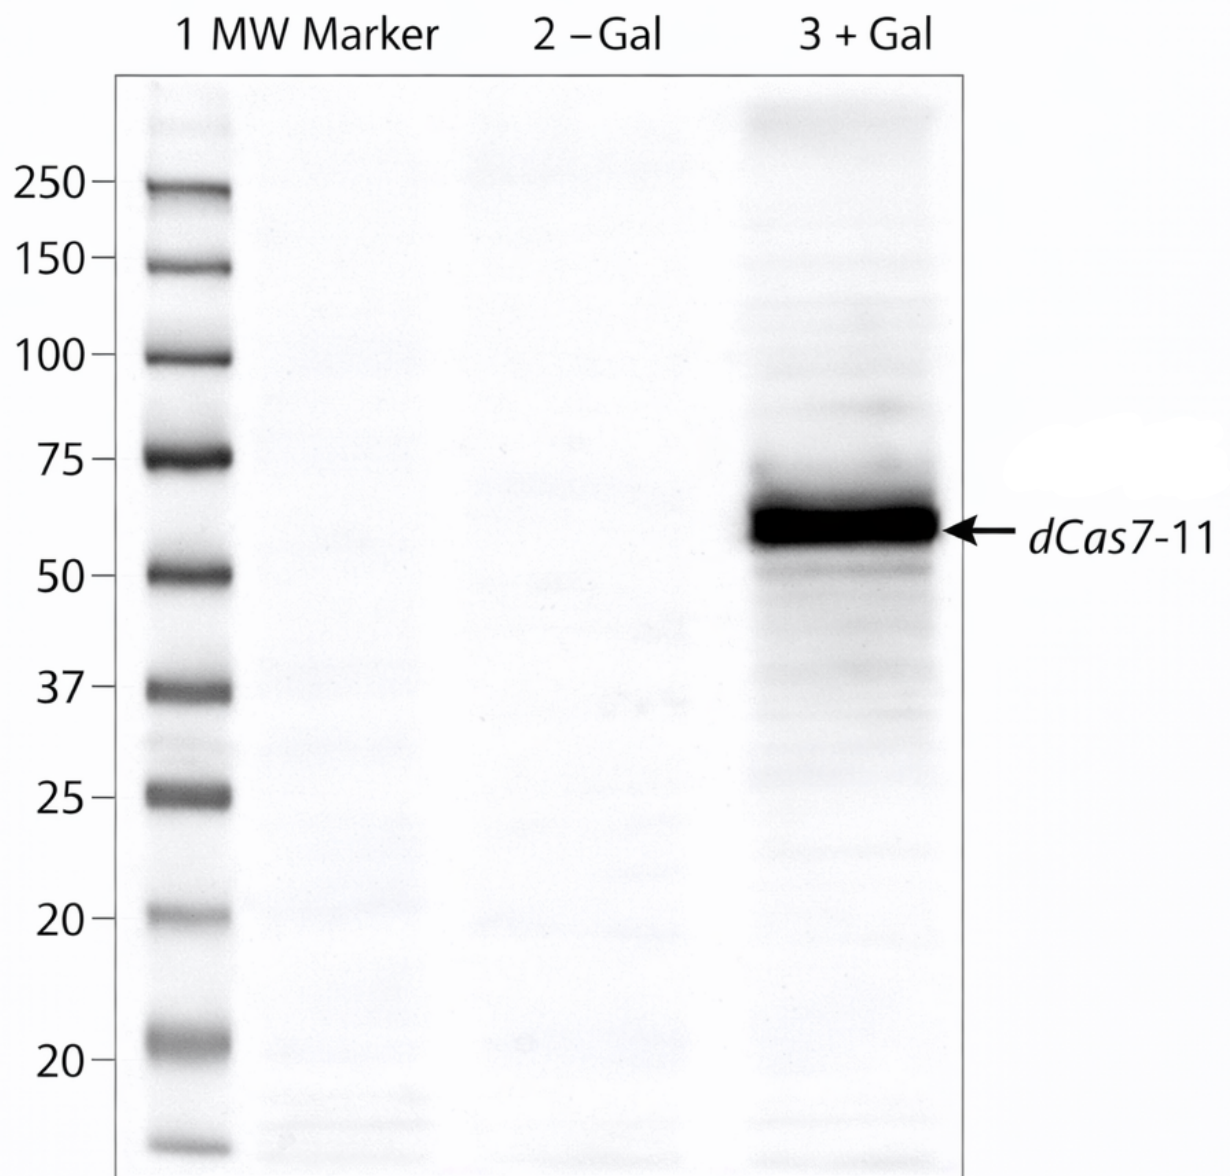

Supplement: Supplementary file 2 [file f77da98281c18f442a25f400.pdf]

Supplementary Figure **S1**. Full SDS-PAGE (*dCas7-11*)

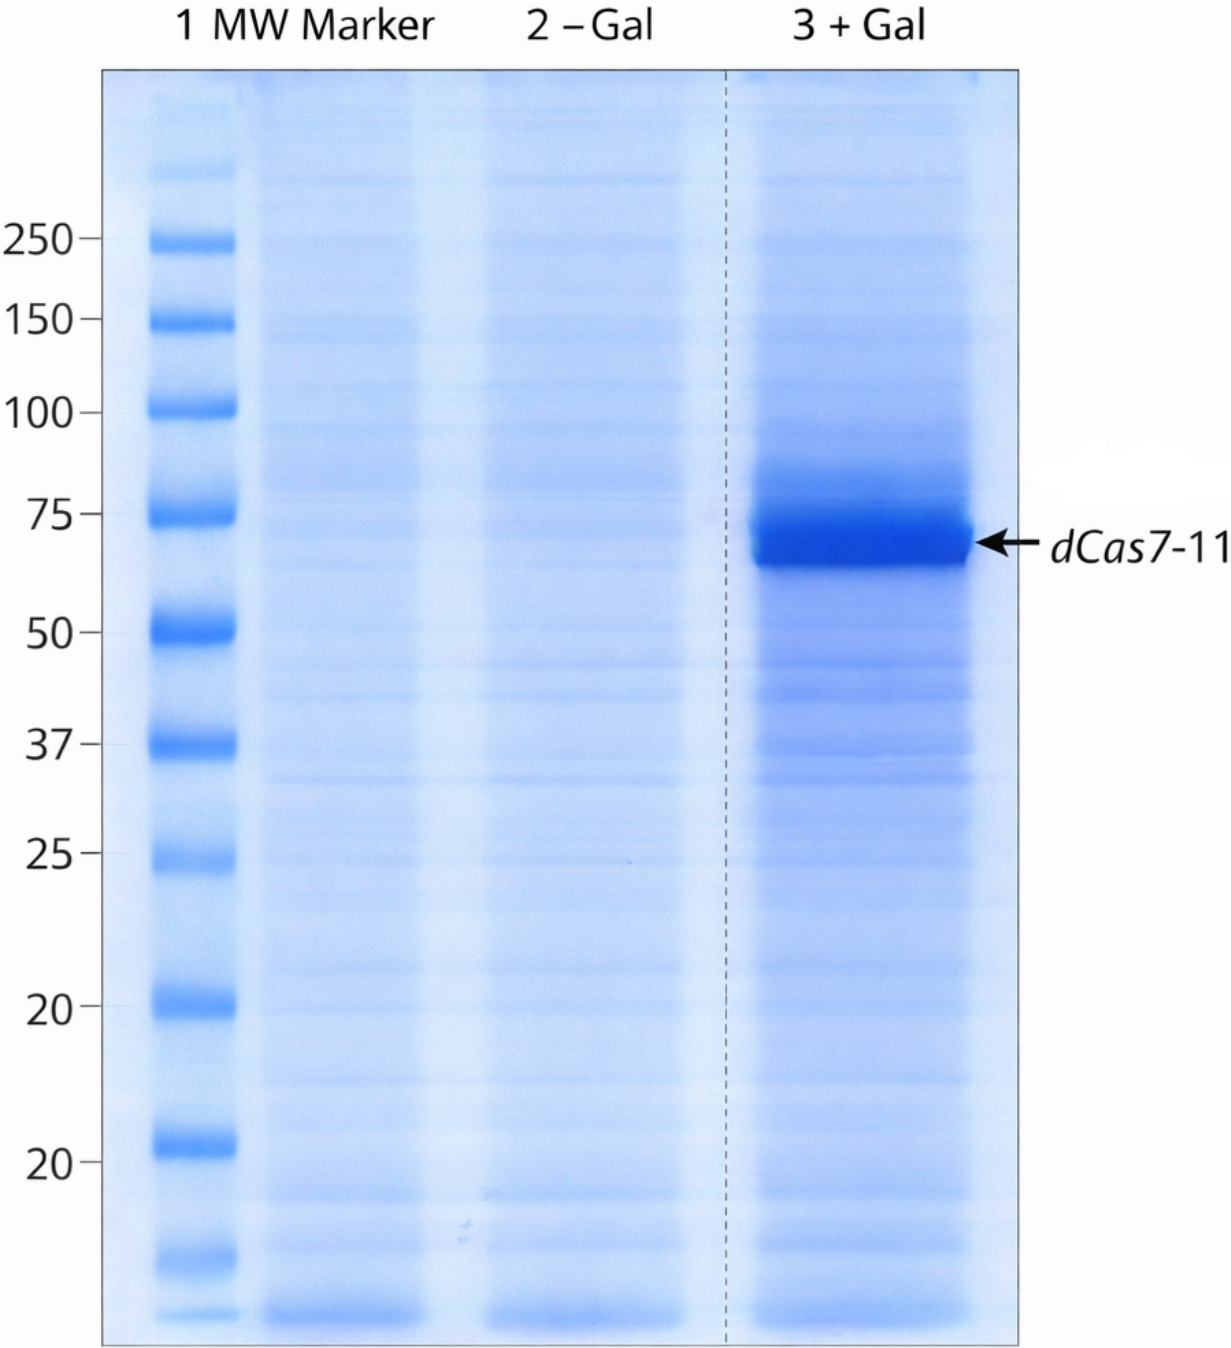

Supplement: Supplementary file 3 [file fd20148d86627ecaa05fa3b8.pdf]
